# Supplementary material for: High-throughput microwave-assisted discovery of new metal phosphonates
Source: Royal Society of Chemistry journal article supplement (doi:10.1039/c3dt50413a), 2013-01-01
Supplement: c3dt50413a.pdf [file c3dt50413a.pdf]

## Supporting information

### High-throughput microwave-assisted discovery of new metal phosphonates

Mark Feyand,<sup>a</sup> Christopher F. Seidler<sup>d</sup>, Carsten Deiter,<sup>b</sup> Andre Rothkirch,<sup>b</sup> Alexandra Lieb<sup>c</sup>,  
Michael Wark<sup>d</sup> and Norbert Stock<sup>a,\*</sup>

*a* Institut für Anorganische Chemie, Christian-Albrechts-Universität, Max-Eyth Straße 2, 24118  
Kiel, Germany E-mail: [stock@ac.uni-kiel.de](mailto:stock@ac.uni-kiel.de)

*b* HASYLAB, DESY Hamburg, Notkestraße 85, 22607 Hamburg, Germany.

*c* Institut für Chemie, Otto von Guericke Universität, Universitätsplatz 2, 39106, Magdeburg,  
Germany.

*d* Lehrstuhl für Technische Chemie, Ruhr-Universität Bochum, Universitätsstr. 150, D44801,  
Bochum, Germany.

|                                    |    |
|------------------------------------|----|
| NMR Spectroscopy.....              | 2  |
| Structure Determination of 2. .... | 5  |
| Crystal Structures.....            | 7  |
| IR Spectroscopy.....               | 10 |
| Thermogravimetric Analyse .....    | 11 |
| Proton Conductivity .....          | 12 |
| Literature.....                    | 13 |

## NMR SPECTROSCOPY

a)  $p\text{-(H}_2\text{O}_3\text{PCH}_2)_2\text{N-C}_6\text{H}_4\text{-N(CH}_2\text{PO}_3\text{H}_2)_2$  ( $p\text{-H}_8\text{L}$ )

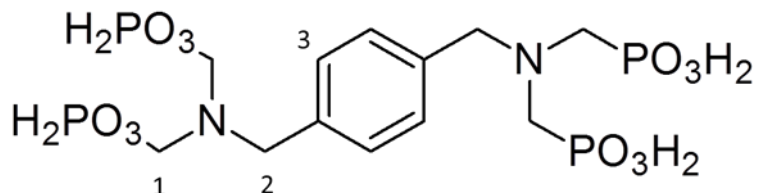

<sup>1</sup>H-NMR (500 MHz, NaOD/D<sub>2</sub>O 10 %, TMS): = 7.11 (s, 4H, C3-H), 3.54 (s, 4H, C2-H), 2.34 (d, 8H, <sup>3</sup>J<sub>P-H</sub> = 11.8 Hz, C1-H) ppm.

<sup>31</sup>P-NMR (500 MHz, NaOD/D<sub>2</sub>O 10 %, H<sub>3</sub>PO<sub>4</sub>): = 17.06 ppm (s).

b)  $m\text{-(H}_2\text{O}_3\text{PCH}_2)_2\text{N-C}_6\text{H}_4\text{-N(CH}_2\text{PO}_3\text{H}_2)_2$  ( $m\text{-H}_8\text{L}$ )

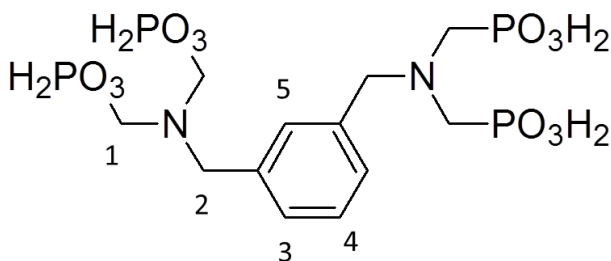

<sup>1</sup>H-NMR (500 MHz, NaOD/D<sub>2</sub>O 10 %, TMS): = 6.80-6.70 (s, 4H, C3-H, C4-H, C5-H), 3.24 (s, 4H, C2-H), 1.90 (d, 8H, <sup>3</sup>J<sub>P-H</sub> = 11.5 Hz, C1-H) ppm.

<sup>31</sup>P-NMR (500 MHz, NaOD/D<sub>2</sub>O 10 %, H<sub>3</sub>PO<sub>4</sub>): = 17.06 ppm (s).

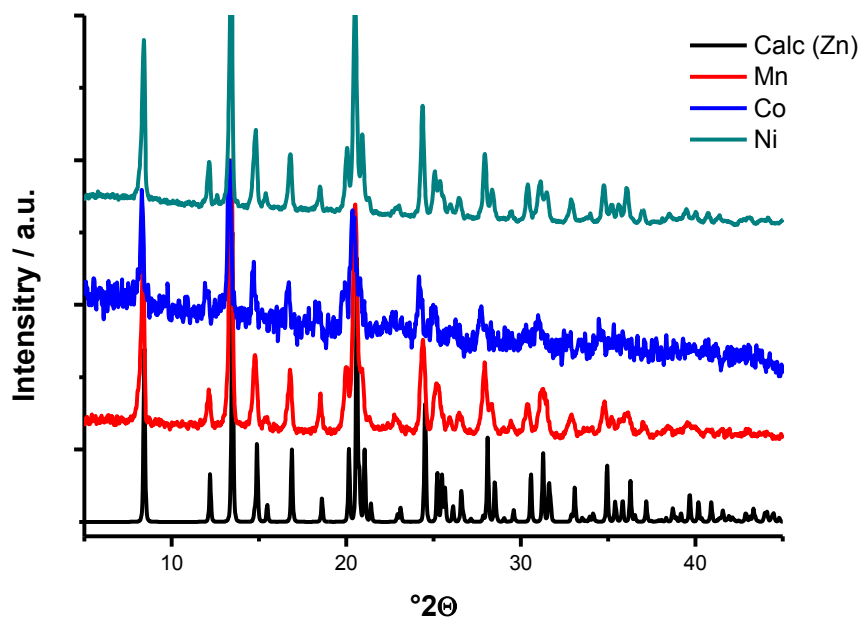

Fig. S2 X-ray powder diffraction patterns of  $M[p-(\text{HO}_3\text{PCH}_2)_2\text{N}(\text{H})-\text{CH}_2-\text{C}_6\text{H}_4-\text{CH}_2-\text{N}(\text{H})(\text{CH}_2\text{PO}_3\text{H})_2(\text{H}_2\text{O})]$  ( $M= \text{Mn}^{2+}$ ,  $\text{Co}^{2+}$ ,  $\text{Ni}^{2+}$ ) (**2**). The structure determination was carried out using XRD pattern of **2** (Zn).

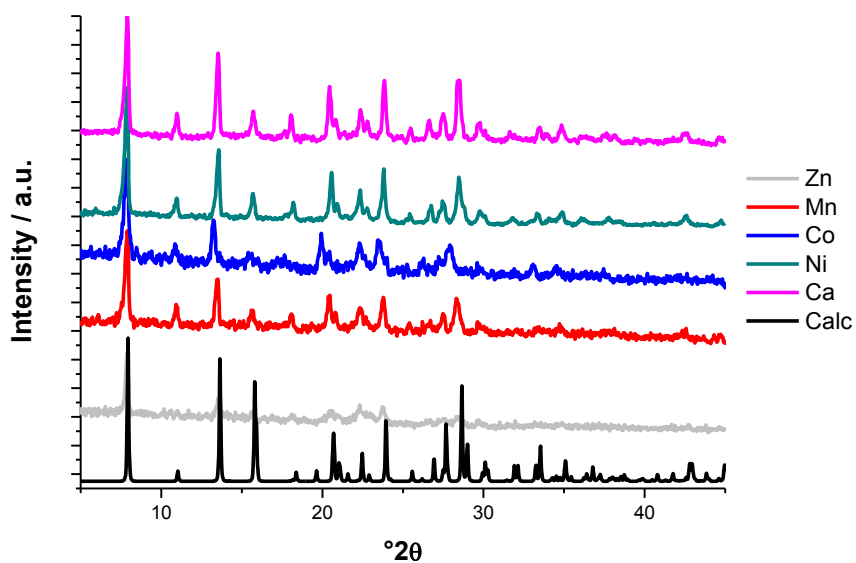

Fig. S3 X-ray powder diffraction patterns of  $M[m-(\text{HO}_3\text{PCH}_2)_2\text{N}(\text{H})-\text{CH}_2-\text{C}_6\text{H}_4-\text{CH}_2-\text{N}(\text{H})(\text{CH}_2\text{PO}_3\text{H})_2]$  ( $\text{H}_2\text{O}$ ) ( $M= \text{Ca}^{2+}$ ,  $\text{Mn}^{2+}$ ,  $\text{Co}^{2+}$ ,  $\text{Ni}^{2+}$ ,  $\text{Zn}^{2+}$ ) (**3**). The calculated powder pattern is shown in black below. The structure determination was carried out using XRD pattern of **3** (Ni).

Exact reaction condition

Table S1. Exact amounts of the educts used in the high-throughput reactions. The following metal salts were used:  $\text{Ca}(\text{NO}_3)_2 \cdot 4\text{H}_2\text{O}$ ,  $\text{Mn}(\text{NO}_3)_2 \cdot 6\text{H}_2\text{O}$ ,  $\text{Co}(\text{NO}_3)_2 \cdot 6\text{H}_2\text{O}$ ,  $\text{Ni}(\text{NO}_3)_2 \cdot 6\text{H}_2\text{O}$ ,  $\text{Zn}(\text{NO}_3)_2 \cdot 6\text{H}_2\text{O}$ ,  $\text{Cd}(\text{NO}_3)_2 \cdot 4\text{H}_2\text{O}$ ,  $\text{CaCl}_2 \cdot 4\text{H}_2\text{O}$ ,  $\text{MnCl}_2 \cdot 2\text{H}_2\text{O}$ ,  $\text{CoCl}_2 \cdot 2\text{H}_2\text{O}$ ,  $\text{NiCl}_2 \cdot 6\text{H}_2\text{O}$ ,  $\text{ZnCl}_2$ ,  $\text{CdCl}_2$

| Metal            | Counterion         | Nr. | H <sub>8</sub> L | M |   | H <sub>8</sub> L [mg] | H <sub>2</sub> O [μl] | 2M M <sup>2+</sup> [μl] | Nr. | Result (identified by XRPD)                                     |
|------------------|--------------------|-----|------------------|---|---|-----------------------|-----------------------|-------------------------|-----|-----------------------------------------------------------------|
| $\text{Ca}^{2+}$ | $\text{NO}_3^{2-}$ | 1   | 1                | 1 |   | 50                    | 2000                  | 49                      | 1   | X-ray amorphous                                                 |
| $\text{Mn}^{2+}$ | $\text{NO}_3^{2-}$ | 2   | 1                | 1 |   | 50                    | 2000                  | 49                      | 2   | X-ray amorphous                                                 |
| $\text{Co}^{2+}$ | $\text{NO}_3^{2-}$ | 3   | 1                | 1 | R | 50                    | 2000                  | 49                      | 3   | X-ray amorphous                                                 |
| $\text{Ni}^{2+}$ | $\text{NO}_3^{2-}$ | 4   | 1                | 1 | 1 | 50                    | 2000                  | 49                      | 4   | X-ray amorphous                                                 |
| $\text{Zn}^{2+}$ | $\text{NO}_3^{2-}$ | 5   | 1                | 1 |   | 50                    | 2000                  | 49                      | 5   | X-ray amorphous                                                 |
| $\text{Cd}^{2+}$ | $\text{NO}_3^{2-}$ | 6   | 1                | 1 | 1 | 50                    | 2000                  | 49                      | 6   | 1                                                               |
|                  |                    |     |                  |   |   |                       |                       |                         |     |                                                                 |
| $\text{Ca}^{2+}$ | Cl                 | 7   | 1                | 1 |   | 50                    | 2000                  | 49                      | 7   | $[\text{Ca}(\text{p-H}_6\text{L})] \cdot 2\text{H}_2\text{O}^1$ |
| $\text{Mn}^{2+}$ | Cl                 | 8   | 1                | 1 |   | 50                    | 2000                  | 49                      | 8   | 2                                                               |
| $\text{Co}^{2+}$ | Cl                 | 9   | 1                | 1 | R | 50                    | 2000                  | 49                      | 9   | 2                                                               |
| $\text{Ni}^{2+}$ | Cl                 | 10  | 1                | 1 | 2 | 50                    | 2000                  | 49                      | 10  | 2                                                               |
| $\text{Zn}^{2+}$ | Cl                 | 11  | 1                | 1 |   | 50                    | 2000                  | 49                      | 11  | 2                                                               |
| $\text{Cd}^{2+}$ | Cl                 | 12  | 1                | 1 |   | 50                    | 2000                  | 49                      | 12  | X-ray amorphous                                                 |
|                  |                    |     |                  |   |   |                       |                       |                         |     |                                                                 |
| $\text{Ca}^{2+}$ | $\text{NO}_3^{2-}$ | 13  | 1                | 1 |   | 50                    | 2000                  | 49                      | 13  | 3                                                               |
| $\text{Mn}^{2+}$ | $\text{NO}_3^{2-}$ | 14  | 1                | 1 |   | 50                    | 2000                  | 49                      | 14  | 3                                                               |
| $\text{Co}^{2+}$ | $\text{NO}_3^{2-}$ | 15  | 1                | 1 | R | 50                    | 2000                  | 49                      | 15  | 3                                                               |
| $\text{Ni}^{2+}$ | $\text{NO}_3^{2-}$ | 16  | 1                | 1 | 3 | 50                    | 2000                  | 49                      | 16  | 3                                                               |
| $\text{Zn}^{2+}$ | $\text{NO}_3^{2-}$ | 17  | 1                | 1 |   | 50                    | 2000                  | 49                      | 17  | 3                                                               |
| $\text{Cd}^{2+}$ | $\text{NO}_3^{2-}$ | 18  | 1                | 1 |   | 50                    | 2000                  | 49                      | 18  | X-ray amorphous                                                 |
|                  |                    |     |                  |   |   |                       |                       |                         |     |                                                                 |
| $\text{Ca}^{2+}$ | Cl                 | 19  | 1                | 1 |   | 50                    | 2000                  | 49                      | 19  | X-ray amorphous                                                 |
| $\text{Mn}^{2+}$ | Cl                 | 20  | 1                | 1 |   | 50                    | 2000                  | 49                      | 20  | X-ray amorphous                                                 |
| $\text{Co}^{2+}$ | Cl                 | 21  | 1                | 1 | R | 50                    | 2000                  | 49                      | 21  | X-ray amorphous                                                 |
| $\text{Ni}^{2+}$ | Cl                 | 22  | 1                | 1 | 4 | 50                    | 2000                  | 49                      | 22  | X-ray amorphous                                                 |
| $\text{Zn}^{2+}$ | Cl                 | 23  | 1                | 1 |   | 50                    | 2000                  | 49                      | 23  | X-ray amorphous                                                 |
| $\text{Cd}^{2+}$ | Cl                 | 24  | 1                | 1 |   | 50                    | 2000                  | 49                      | 24  | X-ray amorphous                                                 |

## STRUCTURE DETERMINATION OF 2.

The crystal structure was solved by molecular modeling techniques using Materials Studio 5.5. The results of the elemental analysis and the indexing procedure need to be taken into account. The elemental analysis lead to the molar ratio  $\text{Zn}^{2+} : \text{linker} = 1 : 1$ . Taking the unit cell volume of  $527 \text{ \AA}^3$  into account and a volume of  $18 \text{ \AA}^3$  per non-hydrogen atom only 30 non-hydrogen atoms fit into the unit cell. According to the chemical formula only one  $\text{Zn}^{2+}$  ion and one tetraphosponate linker molecule can be present in the unit cell. Thus, in the space group  $P-1$  the Zn ion and the linker must be located on special positions. The, for developing the structural model, important inversion centers in the space group  $P-1$  are given in Figure 3 (top). The Zn ion was placed on 0.5/0.5/0.5 and the phenyl ring around 0/0/0 as shown in Figure 3 middle. The phenyl ring was connected by the  $\text{CH}_2\text{-NH-(CH}_2\text{-PO}_3\text{H}^-)_2$  groups with the Zn ion and the coordination sphere was completed by adding a water molecule (Figure 3 bottom). The obtained model was used for further Rietveld refinements.

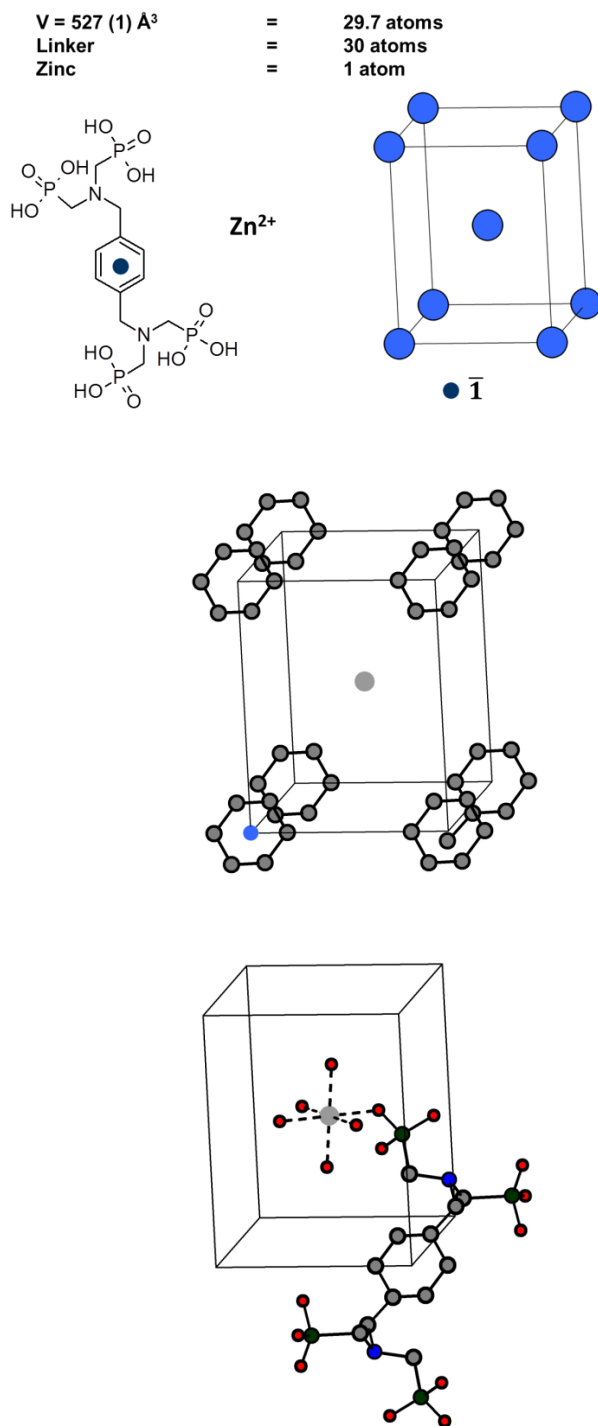

Fig. S4. Important inversion centers in the space group  $P\bar{1}$  for deriving the structural model and the inversion center of the linker molecule (top); Initial model by placing the phenylring and the Zn ion on/ around the inversion center (middle) and final starting model for the Rietveld refinement (bottom).

## CRYSTAL STRUCTURES

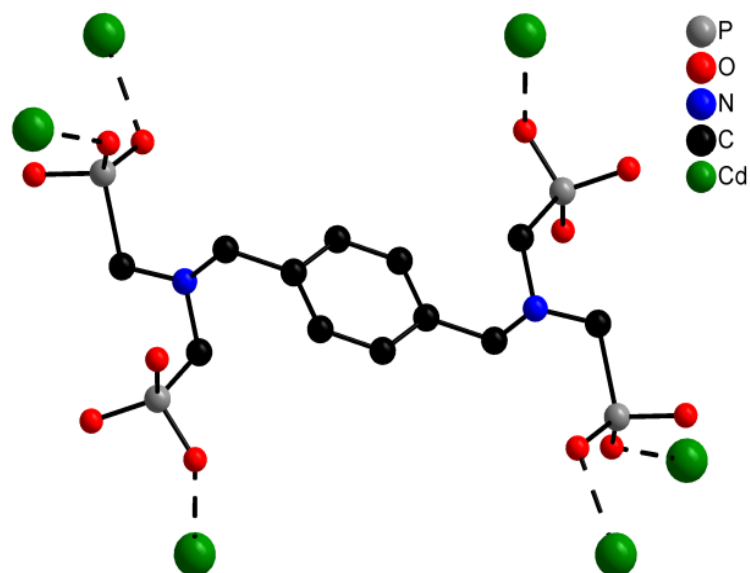

Fig. S5. Interconnection of the  $\text{Cd}^{2+}$  ions by the linker molecule in the structure of  $\text{Cd}[p\text{-(HO}_3\text{PCH}_2)_2\text{N(H)-CH}_2\text{-C}_6\text{H}_4\text{-CH}_2\text{-N(H)(CH}_2\text{PO}_3\text{H)}_2]$  (**1**). Fragmented lines represent Cd-O bonds.

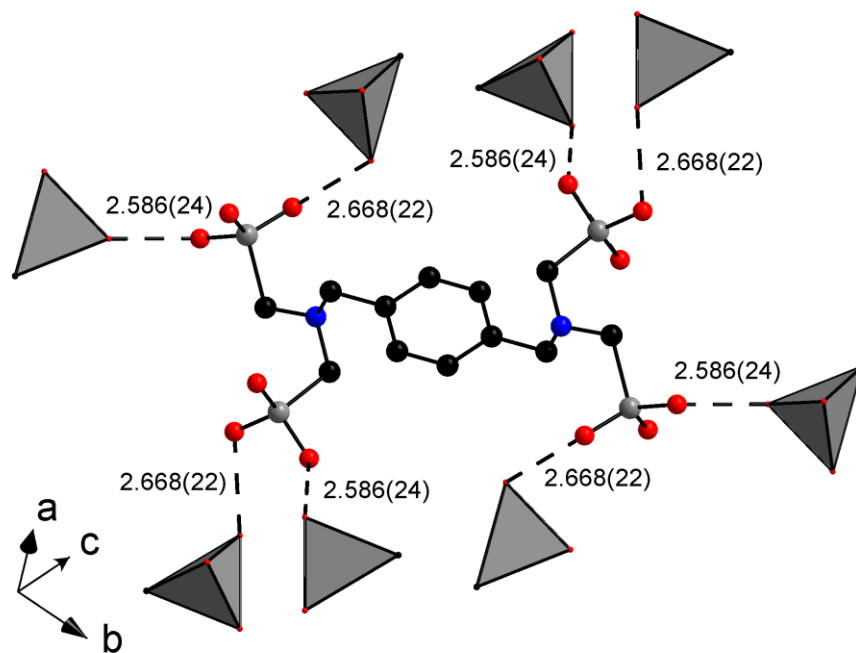

Fig. S6. Hydrogen bonds of the phosphonate groups in compound of  $\text{Cd}[p\text{-(HO}_3\text{PCH}_2)_2\text{N(H)-CH}_2\text{-C}_6\text{H}_4\text{-CH}_2\text{-N(H)(CH}_2\text{PO}_3\text{H)}_2]$  (**1**) and their bond lengths.

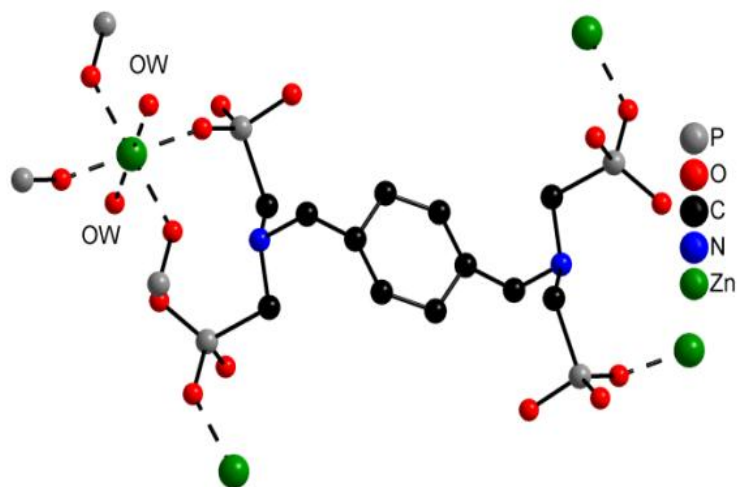

Fig. S7. Interconnection of the metal ions by the linker molecules in the structure of  $M[p-(\text{HO}_3\text{PCH}_2)_2\text{N}(\text{H})-\text{CH}_2-\text{C}_6\text{H}_4-\text{CH}_2-\text{N}(\text{H})(\text{CH}_2\text{PO}_3\text{H})_2(\text{H}_2\text{O})]$  ( $M=\text{Ca}, \text{Mn}, \text{Co}, \text{Ni}, \text{Zn}$ ) (**2**) Fragmented lines represent M-O bonds.

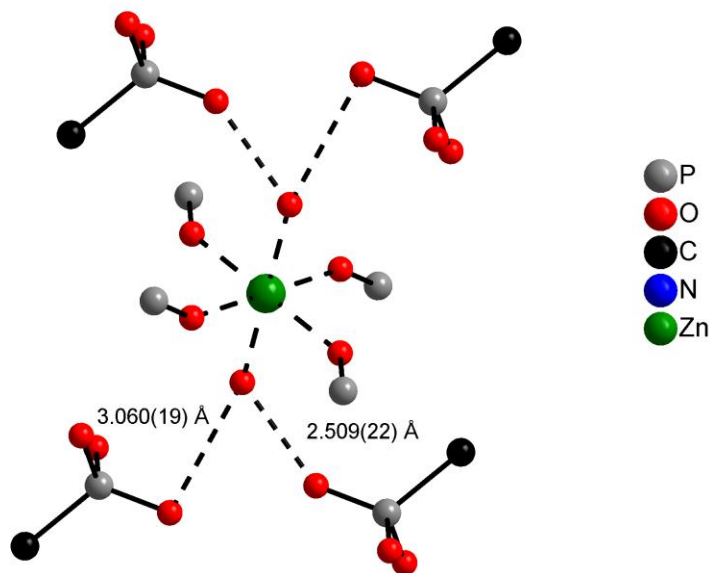

Fig. S8. Possible hydrogen bonds of the coordinated water molecule in the structure of  $\text{Zn}[p-(\text{HO}_3\text{PCH}_2)_2\text{N}(\text{H})-\text{CH}_2-\text{C}_6\text{H}_4-\text{CH}_2-\text{N}(\text{H})(\text{CH}_2\text{PO}_3\text{H})_2(\text{H}_2\text{O})]$  (**2**)



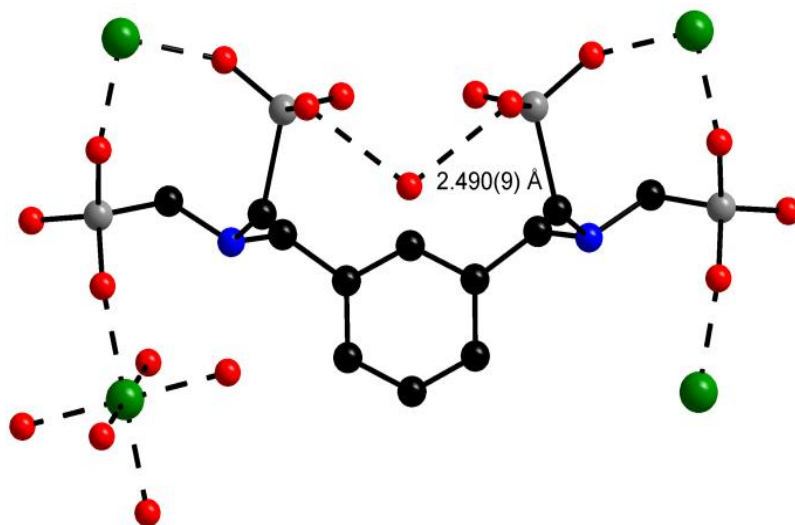

Fig. S9. Interconnection of the metal ions by the linker molecule and possible hydrogen bonds of the water molecule in the structure of  $M[m-(\text{HO}_3\text{PCH}_2)_2\text{N}(\text{H})-\text{CH}_2-\text{C}_6\text{H}_4-\text{CH}_2-\text{N}(\text{H})(\text{CH}_2\text{PO}_3\text{H}_2)]\cdot\text{H}_2\text{O}$  ( $M=\text{Ca}, \text{Mn}, \text{Co}, \text{Ni}, \text{Zn}$ ) (**3**).

## IR SPECTROSCOPY

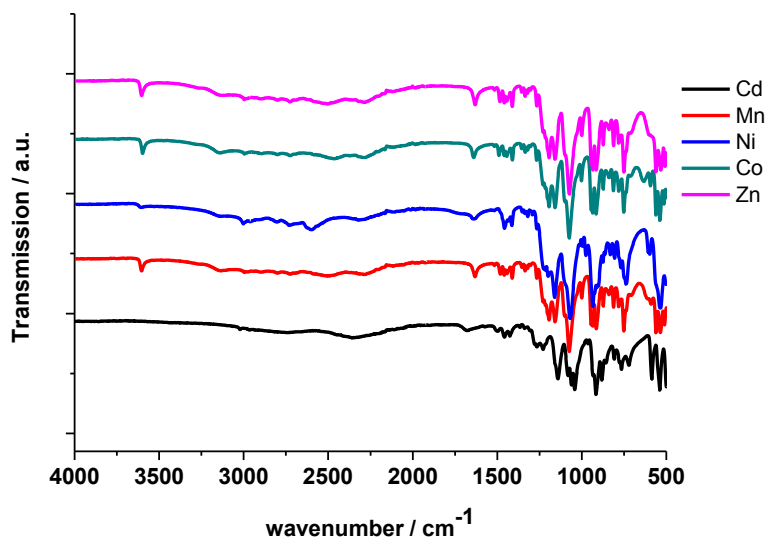

Fig. S10. IR spectra of the title compounds  $M[p\text{-(HO}_3\text{PCH}_2)_2\text{N(H)-CH}_2\text{-C}_6\text{H}_4\text{-CH}_2\text{-N(H)(CH}_2\text{PO}_3\text{H)}_2\text{(H}_2\text{O)}]$  (M=Cd, Mn, Co, Ni, Zn) (**1,2**.)

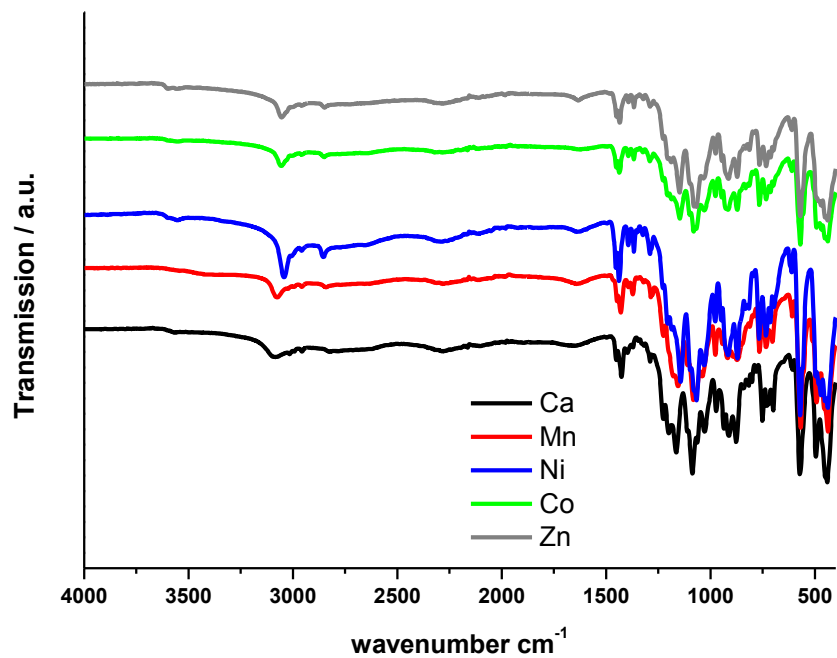

Fig. S11. IR spectra of the title compounds  $M[m\text{-(HO}_3\text{PCH}_2)_2\text{N(H)-CH}_2\text{-C}_6\text{H}_4\text{-CH}_2\text{-N(H)(CH}_2\text{PO}_3\text{H)}_2\text{]}\cdot\text{H}_2\text{O}$  (M=Ca, Mn, Co, Ni, Zn) (**3**).

## THERMOGRAVIMETRIC ANALYSE

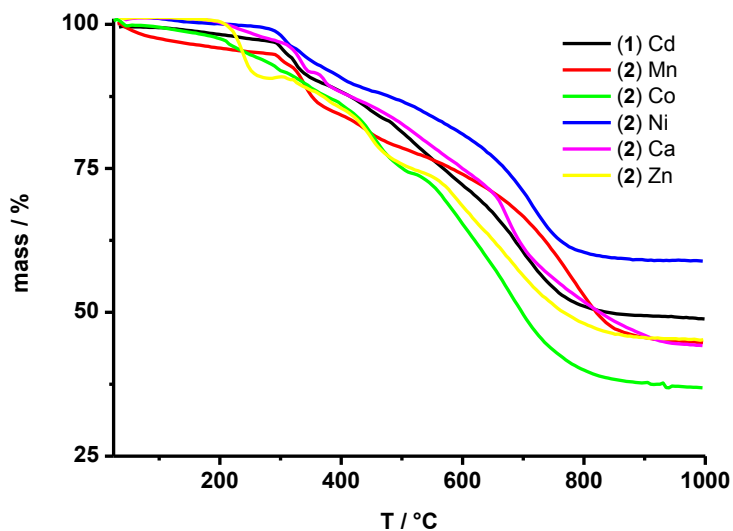

Fig. S12. Results of the thermogravimetric analyses of  $M[p\text{-}(\text{HO}_3\text{PCH}_2)_2\text{N}(\text{H})\text{-CH}_2\text{-C}_6\text{H}_4\text{-CH}_2\text{-N}(\text{H})(\text{CH}_2\text{PO}_3\text{H})_2(\text{H}_2\text{O})]$  ( $M=\text{Cd}, \text{Ca}, \text{Mn}, \text{Co}, \text{Ni}, \text{Zn}$ ) (1,2).

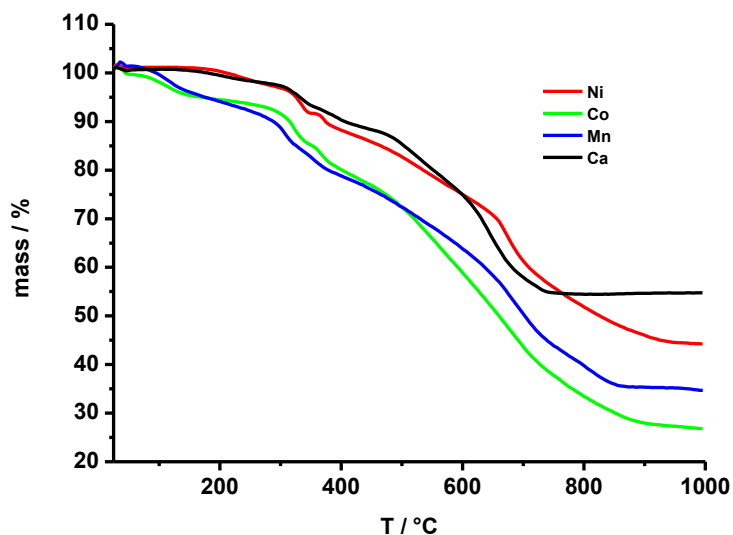

Fig. S13. Results of the thermogravimetric analyses of  $M[m\text{-}(\text{HO}_3\text{PCH}_2)_2\text{N}(\text{H})\text{-CH}_2\text{-C}_6\text{H}_4\text{-CH}_2\text{-N}(\text{H})(\text{CH}_2\text{PO}_3\text{H})_2]\cdot\text{H}_2\text{O}$  ( $M=\text{Ca}, \text{Mn}, \text{Co}, \text{Ni}, \text{Zn}$ ) (3).

## PROTON CONDUCTIVITY

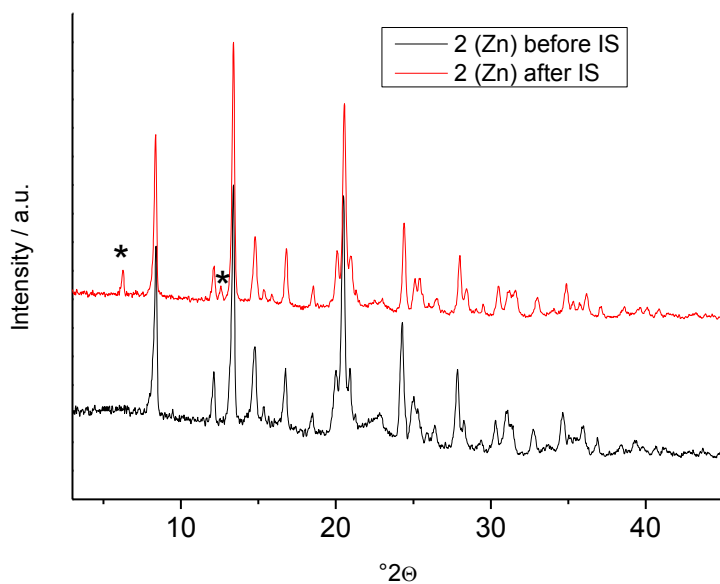

Fig. S14 . X-ray powder patterns before (black) and after (red) impedance spectroscopy measurements of **2** (Zn). The impurities are marked with a star.

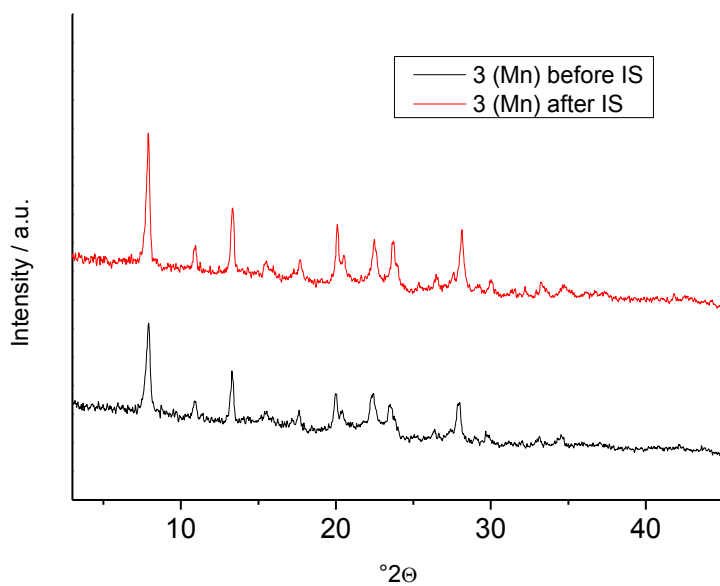

Fig. S15 . X-ray powder patterns before (black) and after (red) impedance spectroscopy measurements of **3** (Mn).

## LITERATURE

1. Stock, N.; Stoll, A.; Bein, T., *Microporous and Mesoporous Materials* **2004**, 69 (1–2), 65.
